# Supplementary material
Source: Springer Nature journal article supplement (https://www.springermedizin.de/resource/supplementary/12894_2012_205_MOESM3_ESM.pdf/9513192)
Supplement: MOESM3 [file 9513192]

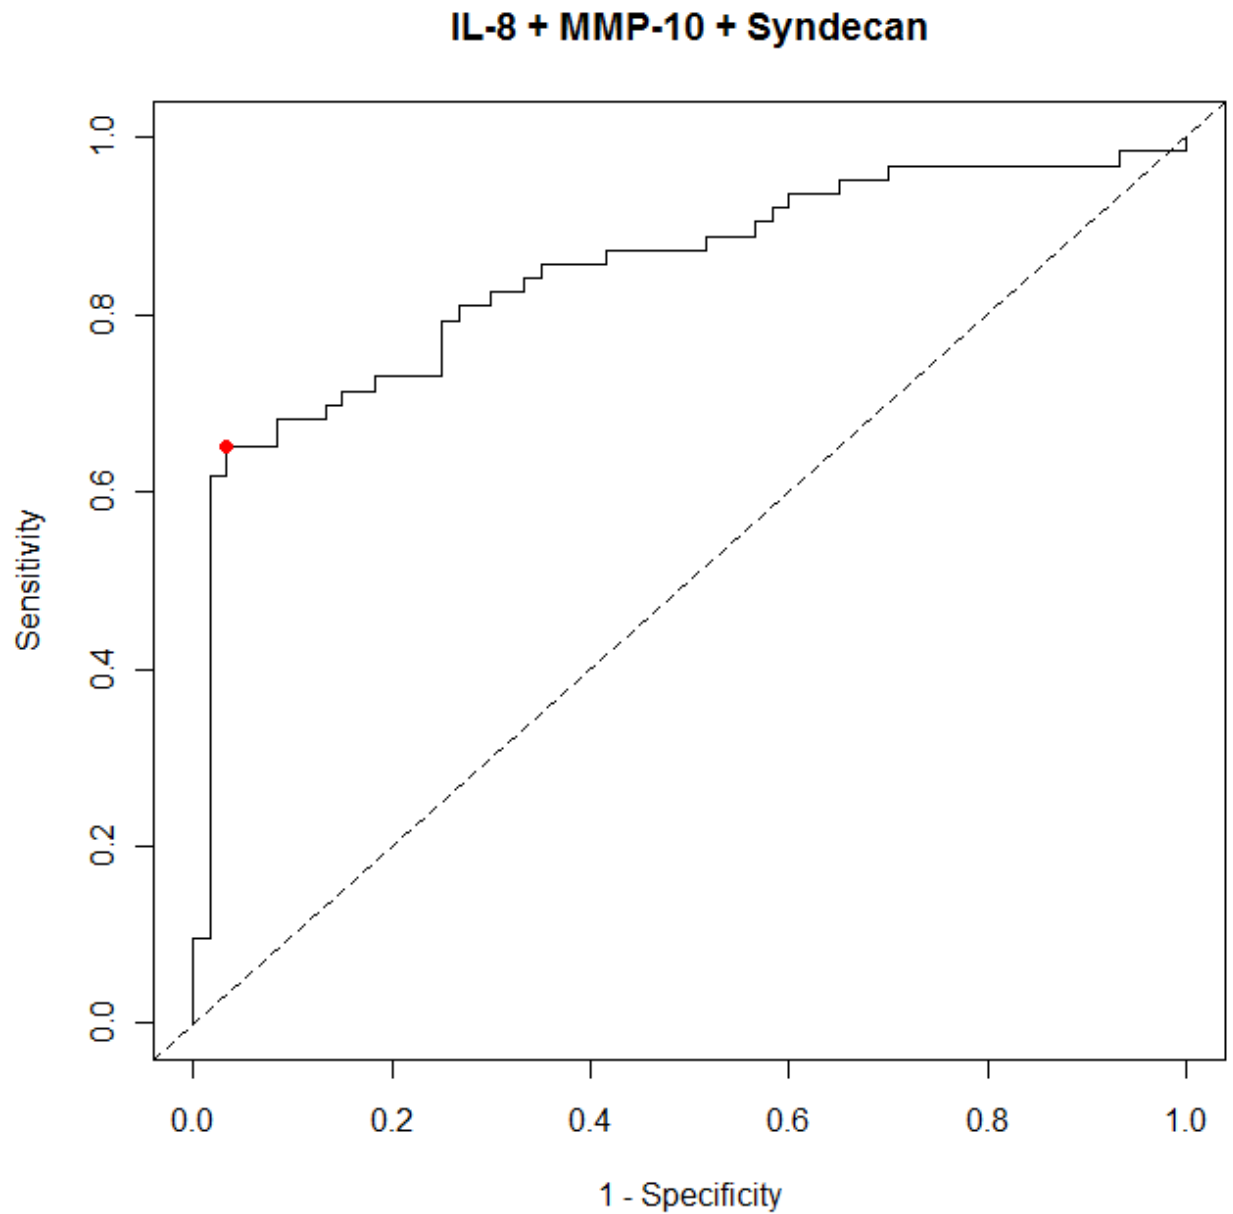

**Figure 2 (b) Receiver operating characteristic (ROC) curves for the combination of IL-8, MMP-10 and Syndecan.** Based on the area under the ROC curve (AUROC), Youden Index cutoff values that maximized the sum of sensitivity and specificity were determined for combination of IL-8, MMP-10 and Syndecan.
